# Supplementary material for: Surface energy alteration-derived grain size regulation countering capacity deterioration in high-voltage single-crystal Ni-rich cathodes
Source: Royal Society of Chemistry journal article supplement (doi:10.1039/d2ta08703k), 2023-01-01
Supplement: d2ta08703k1.pdf [file d2ta08703k1.pdf]

## Supplementary Information

### **Surface energy alterations derived grain size regulation countering the capacity deterioration in high-voltage single- crystal Ni-rich cathodes**

Fuqiren Guo<sup>a</sup>, Yang Hu<sup>a</sup>, Lang Qiu<sup>a</sup>, Yuandi Jiang<sup>a</sup>, Yuting Deng<sup>a</sup>, Junbo Zhou<sup>a</sup>,  
Zhuo Zheng<sup>b</sup>, Yang Liu<sup>c</sup>, Yan Sun<sup>d</sup>, Zhenguo Wu<sup>a</sup>, Yang Song<sup>\*a</sup>, Xiaodong Guo<sup>a</sup>

*a School of Chemical Engineering, Sichuan University, Chengdu, 610065, China.*

*b The State Key Laboratory of Polymer Materials Engineering, Polymer Research Institute of  
Sichuan University, Chengdu, 610065, PR China.*

*c School of Materials Science and Engineering, Henan Normal University, Xinxiang, Henan  
453007 PR China.*

*d School of Mechanical Engineering, Chengdu University, Chengdu, 610106, China.*

*\* Corresponding authors.*

*\* E-mail addresses: [songyang@scu.edu.cn](mailto:songyang@scu.edu.cn) (Yang Song)*

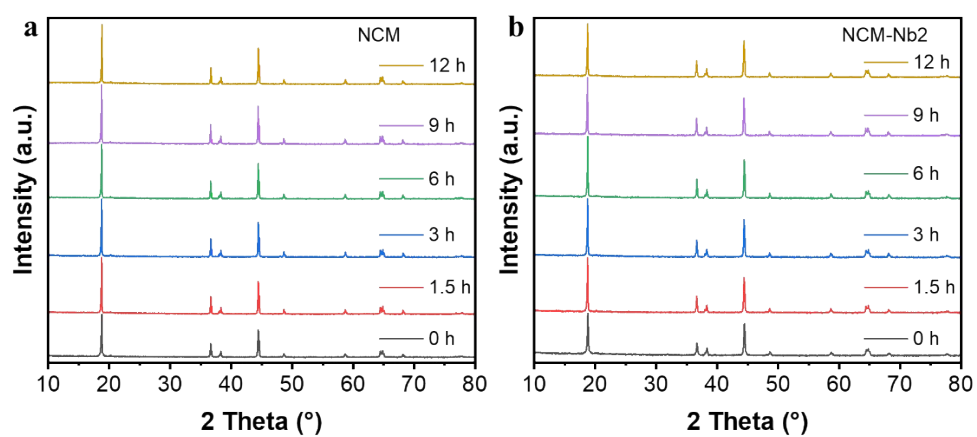

**Fig. S1** The ex-situ XRD patterns of NCM (a) and NCM-Nb2 (b) collected from 0, 1.5, 3, 9 and 12 h at 840 °C under the oxygen atmosphere after quenching.

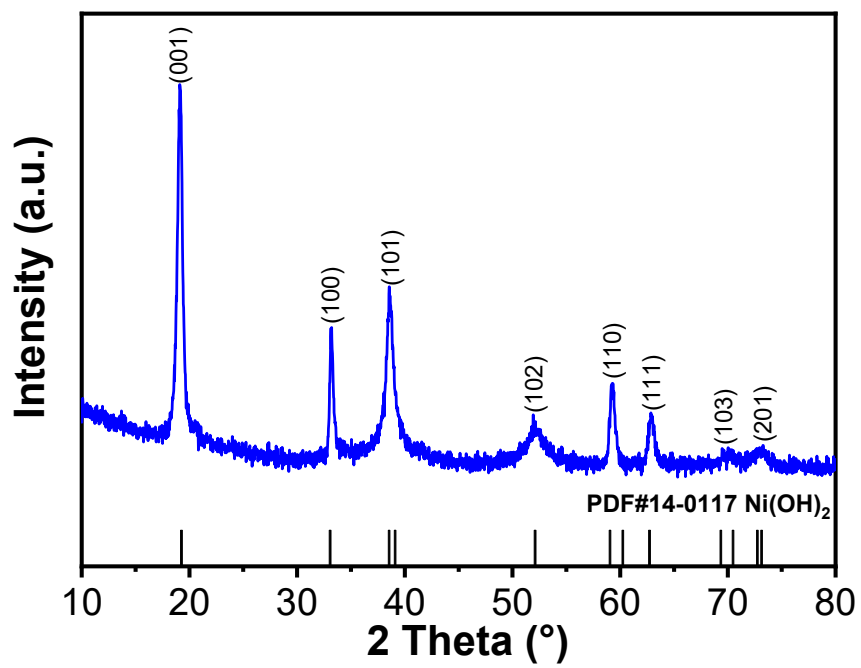

**Fig. S2** XRD pattern of precursor synthesized by hydroxide co-precipitation method, which fits well with the Ni(OH)<sub>2</sub> phase, and there are no apparent impurity phase.

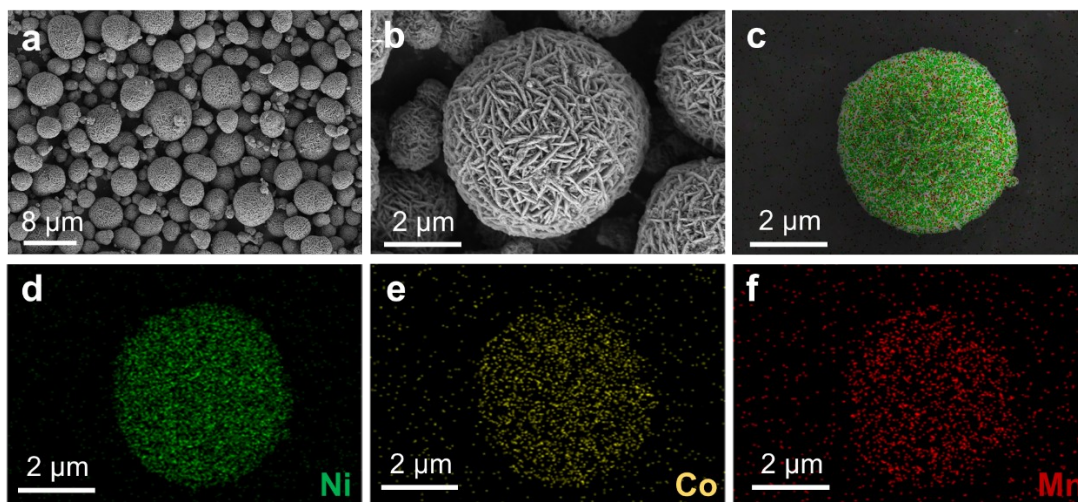

**Fig. S3** (a and b) SEM images of precursor. (c-f) The EDS mapping images of precursor, indicating that the Ni, Co and Mn elements uniformly distribute on spherical particles, which is consistent with the original intention of the coprecipitation method, *i.e.*, three elements with different diffusivity are evenly distributed in the entire particle.

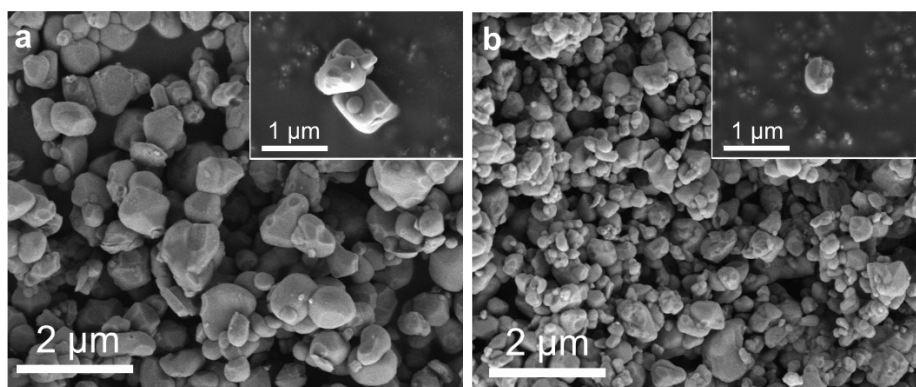

**Fig. S4** SEM images of NCM-Nb1 (a) and NCM-Nb3 (b).

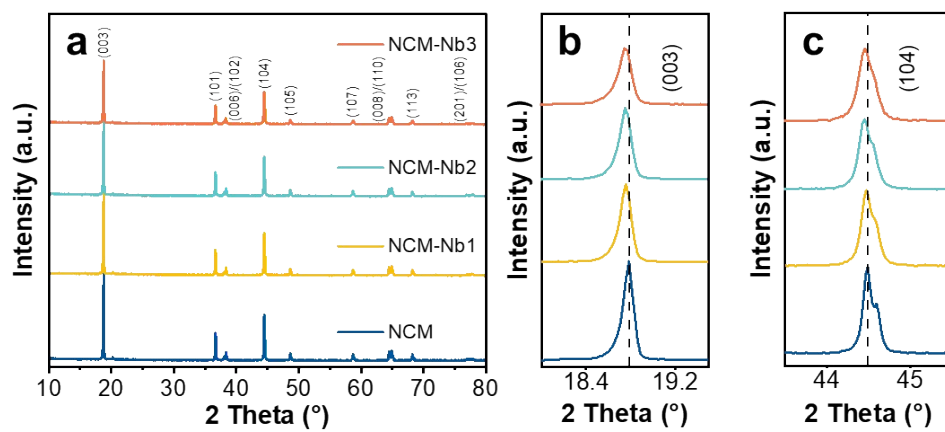

**Fig. S5** (a) XRD patterns and (b and c) magnified graphs of four samples with or without Nb<sup>5+</sup> doping.

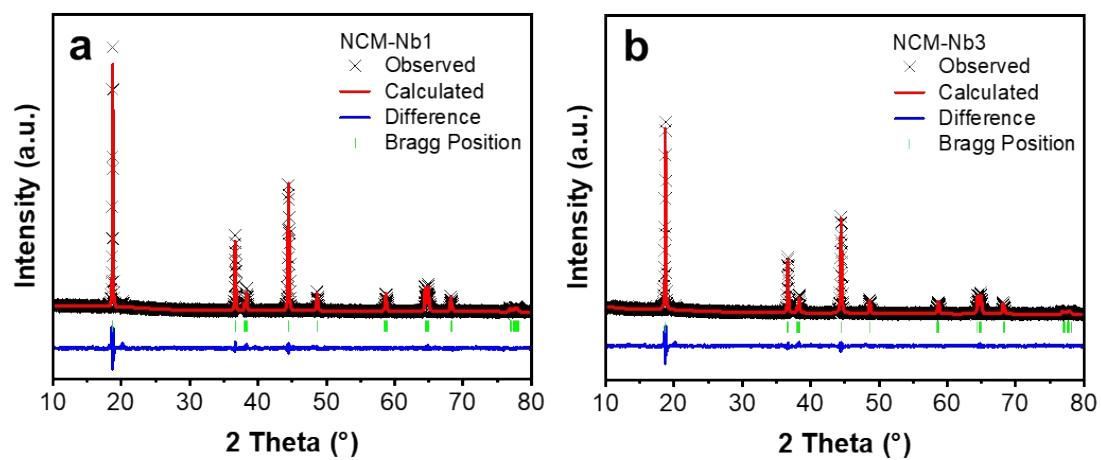

Fig. S6 Corresponding Rietveld refinements of NCM-Nb1 (a), NCM-Nb3 (b).

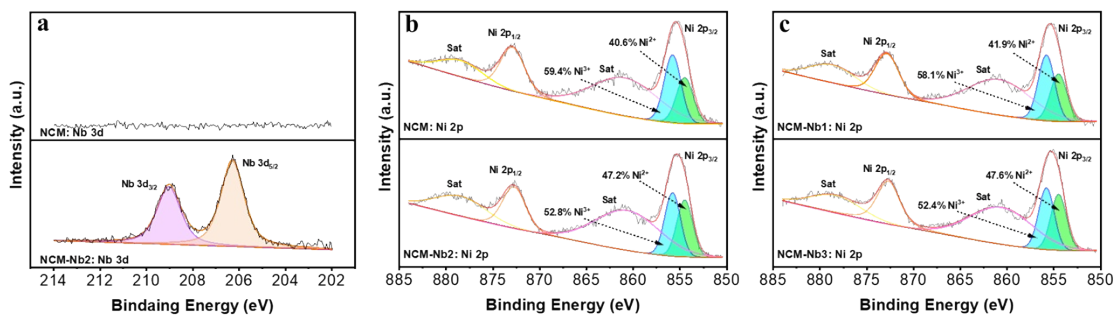

**Fig. S7** The corresponding high-resolution XPS spectra of Nb 3d (a), Ni 2p (b and c).



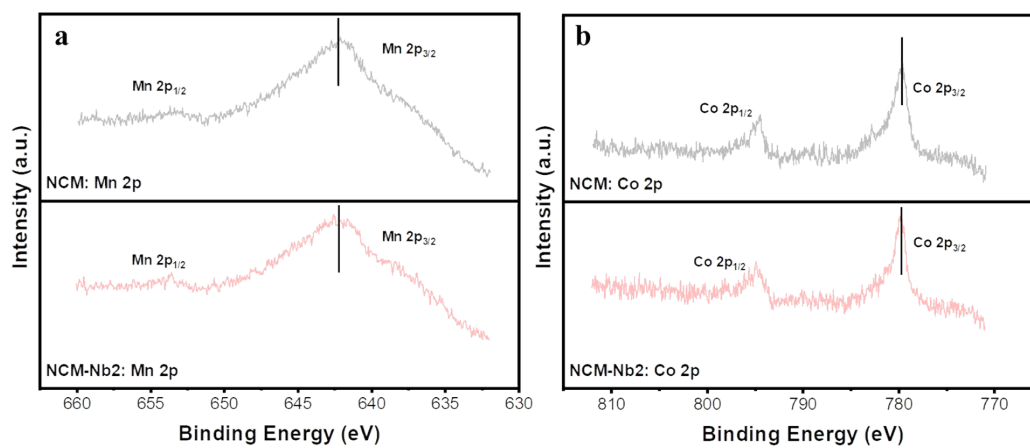

**Fig. S8** Surface XPS measurement results of NCM and NCM-Nb2 of (a) Mn 2p. (b) Co 2p.

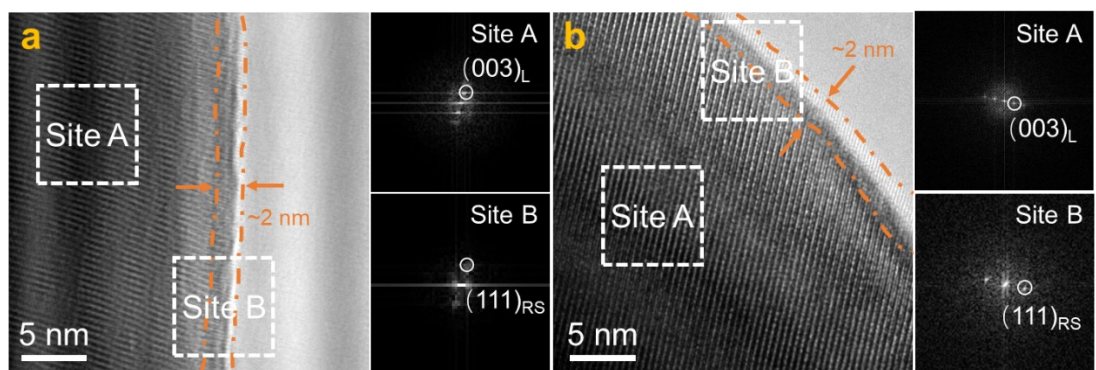

Fig. S9 Two HR-TEM images recorded from different particles for NCM-Nb2. FFT images of selected regions for each particle are shown in the right of a and b. The cation mixing layer on the particle surface of NCM-Nb2 is highlighted by orange dotted line and has a thickness of  $\sim 2$  nm. It further confirms the existence of the uniform cation mixing layer and the clean surface in different particles.

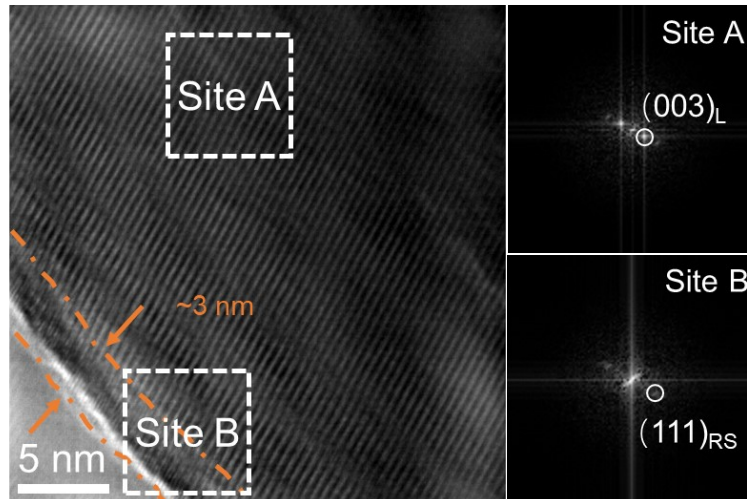

Fig. S10 HR-TEM image of NCM-Nb4 and corresponding FFT images of elected regions. The cation mixing layer on the particle surface of NCM-Nb4 is highlighted by orange dotted line and has a thickness of ~3 nm. The thickness of cation mixing layer is slightly increased compared to NCM-Nb2 (~2 nm). It clearly manifests that increasing the amount of doped Nb<sup>5+</sup> indeed have a positive effect on the thickness of cation mixing layer.

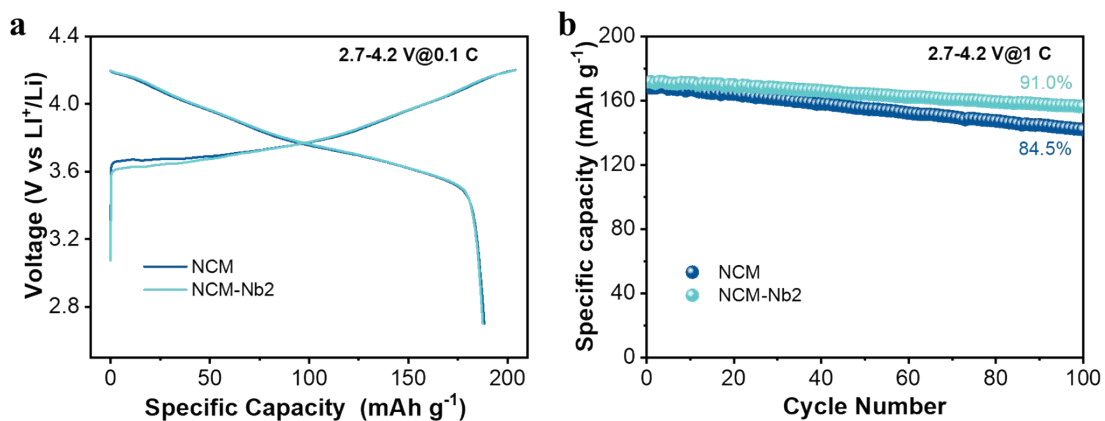

**Fig. S11** Electrochemical characterization of half cells for NCM and NCM-Nb2 at 25 °C and between 2.7-4.2 V. (a) The first charge-discharge curves at 0.1 C. NCM and NCM-Nb2 deliver similar capacities of 188.2 and 187.5 mAh g<sup>-1</sup>, respectively. (b) The cycling curves at 1 C. Obviously, NCM-Nb2 possesses an impressive capacity retention of 91.0% which is higher than that of NCM (84.5%) at a cut-off voltage of 4.2 V.

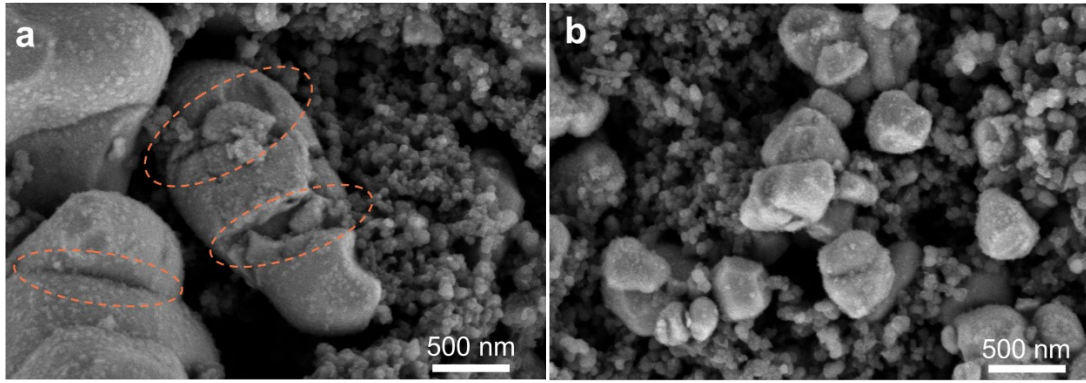

**Fig. S12** The SEM images of NCM (a) and NCM-Nb2 (b) after 100 cycles, and the cracks are marked with orange dotted ovals.

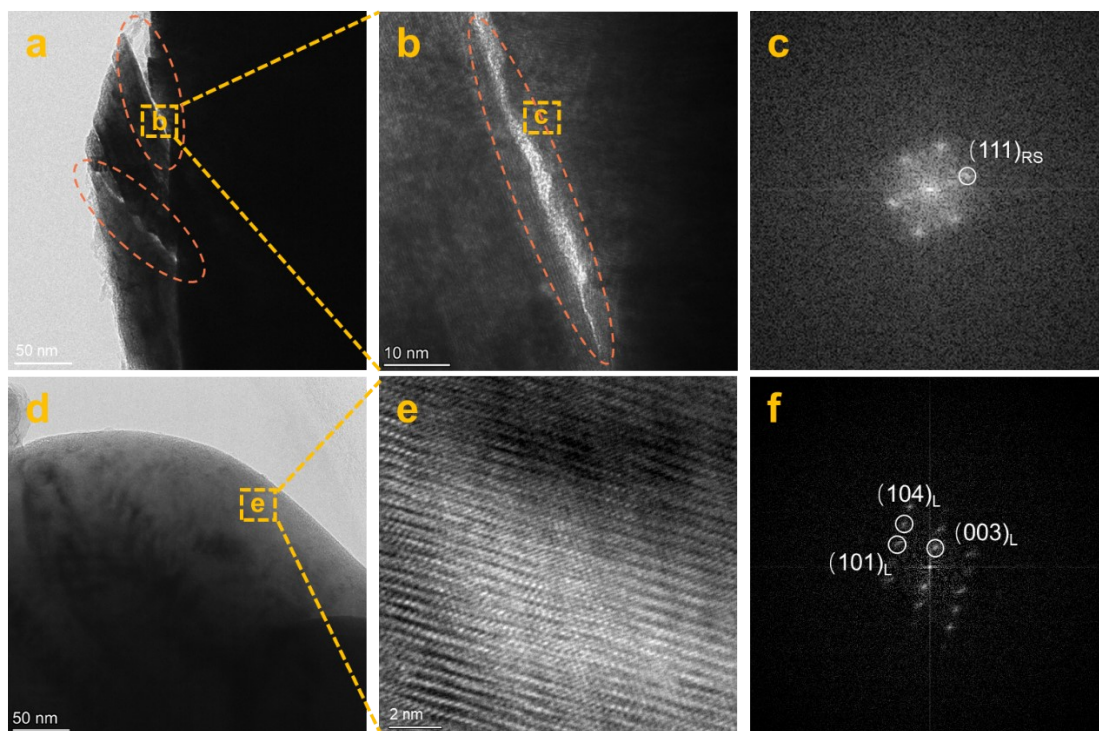

**Fig. S13** TEM images along with FFT images of selected regions for NCM (a-c) and NCM-Nb2 (d-f) after 100 cycles, and the intragranular cracks are marked with orange dotted ovals.

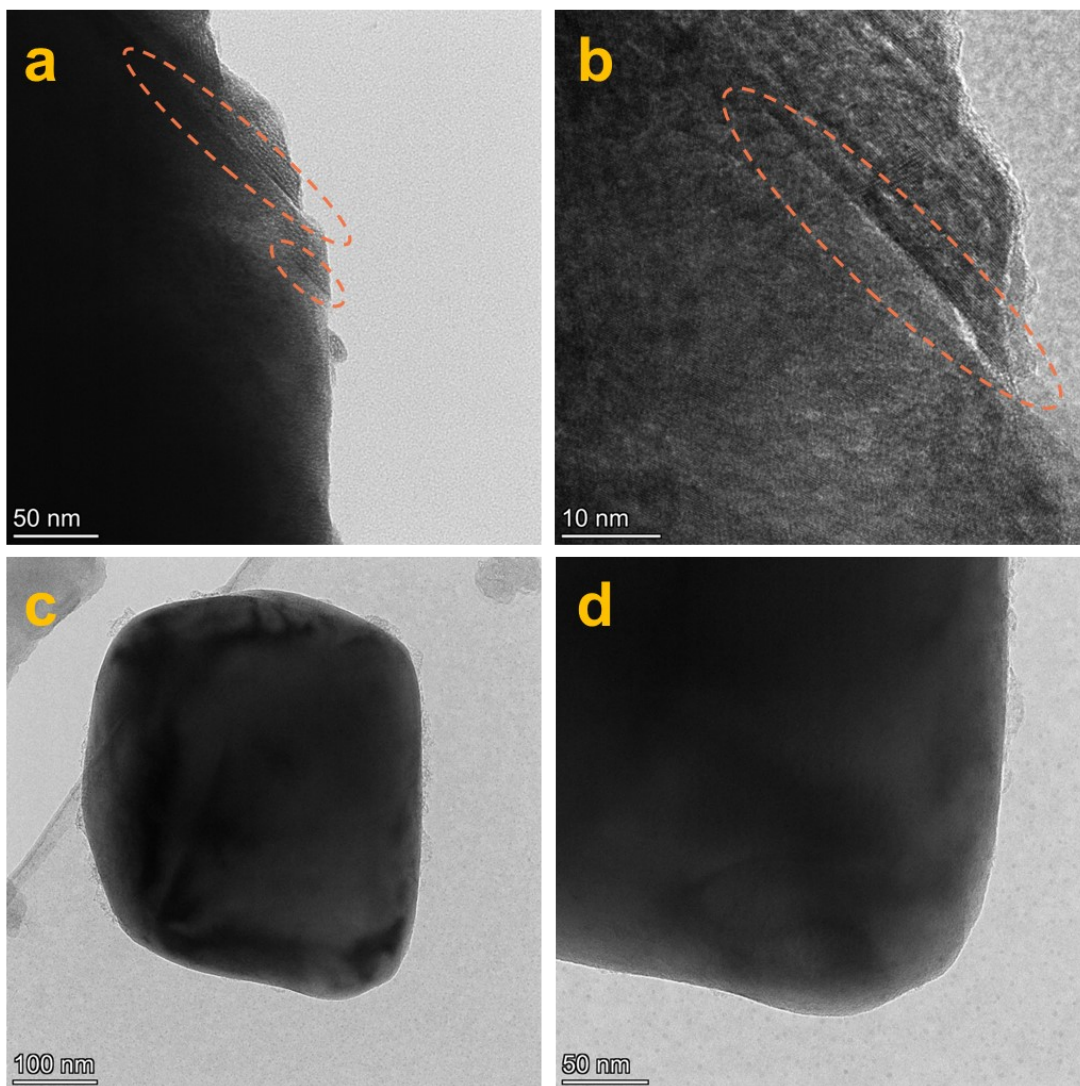

**Fig. S14** TEM images for NCM (a-b) and NCM-Nb2 (c-d) which were collected from half-cells after charged to 4.8 V, and the planar slips are marked with orange dotted ovals.

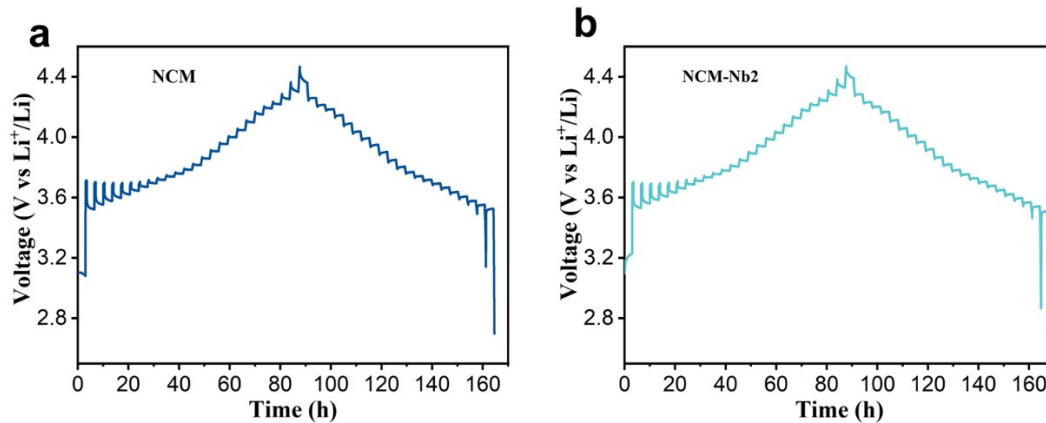

**Fig. S15** The GITT curves of NCM (a) and NCM-Nb2 (b) during the 1<sup>st</sup> charge-discharge process.



**Table. S1** Element composition of the precursor by ICP test.

| Elements                       | Ni    | Co    | Mn    |
|--------------------------------|-------|-------|-------|
| <b>Proportions<br/>(mol %)</b> | 0.826 | 0.120 | 0.054 |

**Table. S2** Surface energy for (001), (012) and (104) faces of pristine and Nb-doped LNO (in J m<sup>-2</sup>). The reduction is calculated by extracting the energy difference for the Nb-doped and pristine LNO surfaces.

| Faces            | (001) | (012) | (104) |
|------------------|-------|-------|-------|
| <b>Pristine</b>  | 2.274 | 2.106 | 0.836 |
| <b>Nb-doped</b>  | 1.151 | 1.697 | 0.715 |
| <b>Reduction</b> | 49.4% | 19.4% | 14.5% |

**Table. S3** The Rietveld refinement data for NCM, NCM-Nb1, NCM-Nb2 and NCM-Nb3. Importantly, the low values of R<sub>wp</sub> and R<sub>p</sub> infer that it is relatively reliable for these refinement results. Four samples are layered structure with R-3m space group.

| Materials      | <i>a</i> [Å] | <i>c</i> [Å] | <i>V</i> [Å <sup>3</sup> ] | Ni <sup>2+</sup> in |       | R <sub>p</sub> | R <sub>WP</sub> | I <sub>(003)</sub> / I <sub>(104)</sub> |
|----------------|--------------|--------------|----------------------------|---------------------|-------|----------------|-----------------|-----------------------------------------|
|                |              |              |                            | Li <sup>+</sup>     | sites |                |                 |                                         |
| <b>NCM</b>     | 2.8708(0)    | 14.1844(1)   | 101.240(2)                 | 0.48%               |       | 2.47%          | 3.71%           | 2.29                                    |
| <b>NCM-Nb1</b> | 2.8708(0)    | 14.1891(2)   | 101.270(2)                 | 1.75%               |       | 2.31%          | 3.29%           | 2.06                                    |
| <b>NCM-Nb2</b> | 2.8718(0)    | 14.1944(3)   | 101.380(4)                 | 2.71%               |       | 2.25%          | 3.17%           | 2.03                                    |
| <b>NCM-Nb3</b> | 2.8722(0)    | 14.1973(2)   | 101.430(3)                 | 3.33%               |       | 2.30%          | 3.23%           | 1.94                                    |

**Table. S4** Crystallographic information of NCM (R-3m space group) obtained from Rietveld refinement

| Atom  | Site | x      | y      | z      | Occ.   | Uiso   |
|-------|------|--------|--------|--------|--------|--------|
| Li(1) | 3b   | 0.0000 | 0.0000 | 0.5000 | 0.9952 | 0.0016 |
| Ni(1) | 3b   | 0.0000 | 0.0000 | 0.5000 | 0.0048 | 0.0016 |
| Li(2) | 3a   | 0.0000 | 0.0000 | 0.0000 | 0.0048 | 0.0097 |
| Ni(2) | 3a   | 0.0000 | 0.0000 | 0.0000 | 0.8252 | 0.0097 |
| Co    | 3a   | 0.0000 | 0.0000 | 0.0000 | 0.0500 | 0.0097 |
| Mn    | 3a   | 0.0000 | 0.0000 | 0.0000 | 0.1200 | 0.0097 |

|   |    |        |        |        |        |        |
|---|----|--------|--------|--------|--------|--------|
| O | 6c | 0.0000 | 0.0000 | 0.2590 | 1.0000 | 0.0100 |
|---|----|--------|--------|--------|--------|--------|

**Table. S5** Crystallographic information of NCM-Nb1 (R-3m space group) obtained from Rietveld refinement

| Atom  | Site | x      | y      | z      | Occ.   | Uiso   |
|-------|------|--------|--------|--------|--------|--------|
| Li(1) | 3b   | 0.0000 | 0.0000 | 0.5000 | 0.9825 | 0.0105 |
| Ni(1) | 3b   | 0.0000 | 0.0000 | 0.5000 | 0.0175 | 0.0105 |
| Li(2) | 3a   | 0.0000 | 0.0000 | 0.0000 | 0.0175 | 0.0107 |
| Ni(2) | 3a   | 0.0000 | 0.0000 | 0.0000 | 0.8152 | 0.0107 |
| Co    | 3a   | 0.0000 | 0.0000 | 0.0000 | 0.0500 | 0.0107 |
| Mn    | 3a   | 0.0000 | 0.0000 | 0.0000 | 0.1200 | 0.0107 |
| O     | 6c   | 0.0000 | 0.0000 | 0.2591 | 1.0000 | 0.0100 |

**Table. S6** Crystallographic information of NCM-Nb2 (R-3m space group) obtained from Rietveld refinement

| Atom  | Site | x      | y      | z      | Occ.   | Uiso   |
|-------|------|--------|--------|--------|--------|--------|
| Li(1) | 3b   | 0.0000 | 0.0000 | 0.5000 | 0.9729 | 0.0160 |
| Ni(1) | 3b   | 0.0000 | 0.0000 | 0.5000 | 0.0271 | 0.0160 |
| Li(2) | 3a   | 0.0000 | 0.0000 | 0.0000 | 0.0271 | 0.0085 |
| Ni(2) | 3a   | 0.0000 | 0.0000 | 0.0000 | 0.8029 | 0.0085 |
| Co    | 3a   | 0.0000 | 0.0000 | 0.0000 | 0.0500 | 0.0085 |
| Mn    | 3a   | 0.0000 | 0.0000 | 0.0000 | 0.1200 | 0.0085 |
| O     | 6c   | 0.0000 | 0.0000 | 0.2607 | 1.0000 | 0.0100 |

**Table. S7** Crystallographic information of NCM-Nb3 (R-3m space group) obtained from Rietveld refinement

| Atom  | Site | x      | y      | z      | Occ.   | Uiso   |
|-------|------|--------|--------|--------|--------|--------|
| Li(1) | 3b   | 0.0000 | 0.0000 | 0.5000 | 0.9667 | 0.0170 |
| Ni(1) | 3b   | 0.0000 | 0.0000 | 0.5000 | 0.0333 | 0.0170 |
| Li(2) | 3a   | 0.0000 | 0.0000 | 0.0000 | 0.0333 | 0.0116 |
| Ni(2) | 3a   | 0.0000 | 0.0000 | 0.0000 | 0.7967 | 0.0116 |
| Co    | 3a   | 0.0000 | 0.0000 | 0.0000 | 0.0500 | 0.0116 |
| Mn    | 3a   | 0.0000 | 0.0000 | 0.0000 | 0.1200 | 0.0116 |
| O     | 6c   | 0.0000 | 0.0000 | 0.2594 | 1.0000 | 0.0100 |

**Table. S8** Summary of electrochemical performance data for relevant literatures

| Reference         | Cathode material                                                             | Modified method  | Discharge specific capacity at the 100 <sup>th</sup> cycle (mAh g <sup>-1</sup> ) / cycle retention | Rate capacity (mAh g <sup>-1</sup> , 5C) |
|-------------------|------------------------------------------------------------------------------|------------------|-----------------------------------------------------------------------------------------------------|------------------------------------------|
| Ref. <sup>1</sup> | SC-LiNi <sub>0.8</sub> Co <sub>0.1</sub> Mn <sub>0.1</sub> O <sub>2</sub>    | PMMA coating     | 156.2 / ~82.5% (4.5 V)                                                                              | ~172.3                                   |
| Ref. <sup>2</sup> | SC-LiNi <sub>0.8</sub> Co <sub>0.1</sub> Mn <sub>0.1</sub> O <sub>2</sub>    | Ta doping        | ~174.4 / ~90.4% (4.3 V, 0.5 C)                                                                      | 157 (4 C)                                |
| Ref. <sup>3</sup> | SC-LiNi <sub>0.7</sub> Co <sub>0.1</sub> Mn <sub>0.2</sub> O <sub>2</sub>    | Al doping        | ~145.3 / ~80% (80 cycles)                                                                           | —                                        |
| Ref. <sup>4</sup> | SC-LiNi <sub>0.9</sub> Co <sub>0.05</sub> Mn <sub>0.05</sub> O <sub>2</sub>  | Ce doping        | ~142.2 / ~80.5% (4.3 V, 0.5 C, 30°C)                                                                | —                                        |
| Ref. <sup>5</sup> | SC-LiNi <sub>0.83</sub> Co <sub>0.12</sub> Mn <sub>0.05</sub> O <sub>2</sub> | B doping         | 137.2 / ~74% (0.5 C)                                                                                | —                                        |
| Ref. <sup>6</sup> | PC-LiNi <sub>0.92</sub> Co <sub>0.05</sub> Mn <sub>0.03</sub> O <sub>2</sub> | Ti/B co-doping   | 150 / 78.3%                                                                                         | 160.0                                    |
| Ref. <sup>7</sup> | SC-LiNi <sub>0.6</sub> Co <sub>0.2</sub> Mn <sub>0.2</sub> O <sub>2</sub>    | Al/Zr co-doping  | 144.2 / 80.1%                                                                                       | —                                        |
| Ref. <sup>8</sup> | PC-LiNi <sub>0.92</sub> Co <sub>0.04</sub> Mn <sub>0.04</sub> O <sub>2</sub> | Si doping        | 157.2 / 75.2% (0.3 C)                                                                               | —                                        |
| <b>This work</b>  | <b>SC-LiNi<sub>0.83</sub>Co<sub>0.12</sub>Mn<sub>0.05</sub>O<sub>2</sub></b> | <b>Nb doping</b> | <b>155.0 / 80.2%;<br/>156.3 / 91.0% (4.2 V)</b>                                                     | <b>152.3</b>                             |

Notes: Unless otherwise stated, the cycle tests are performed at 25 ° C, a rate of 1C and an upper cut-off voltage of 4.4V. PC and SC represent poly-crystal and single-crystal, respectively.

**Formula. S1** The analytical cylindrical isotropic diffusion-induced-stress model<sup>9</sup>:

$$\Pi = \int \frac{\sigma^2}{2E} dV = \pi * h * \left[ \frac{\alpha * E_0 * (C_R - C_0)}{1 - \nu} \right]^2 * \int_0^r \xi^2 \frac{1}{E} r dr$$

where  $\Pi$  is the strain energy inside grain,  $h$  is the height of the cylindrical grain,  $\alpha$  is the concentration expansion coefficient,  $E_0$  is Young's modulus of the nonlithiated particle,  $E$  is Young's modulus at a given Li-ion concentration,  $C_R$  is the Li-ion concentration at the surface,  $C_0$  is the Li-ion concentration at the center,  $\nu$  is Poisson's ratio,  $\xi$  represents the dimensionless stress.

**Formula. S2** Since only the upper surface was optimized by one dopant atom in this calculation model, the surface energy calculation formula is defined as follows<sup>10</sup>:

$$\gamma = \frac{\Delta E_{sur}}{A} = \frac{1}{2A}(E_{cleaved} - E_{bulk}) + \frac{1}{A}(E_{relaxed} - E_{cleaved})$$

here  $\Delta E_{cleaved}$  is the cleaving energy caused by the formation of two new surfaces on both sides of the vacuum slab which is triggered by the bond breaking between the atoms.  $\Delta E_{bulk}$  is the energy of the original host crystal.  $\Delta E_{relax}$  is the energy change caused by the relaxation of atoms into a stable position near a newly formed surface. In addition, the cross-sectional area  $A$  of the three crystal faces, *i.e.*, (001), (012), and (104), are 62.076, 125.917 and 144.890 Å<sup>2</sup>, respectively.

**Formula. S3** Classical nucleation theory<sup>11</sup>:

$$\Delta G = \frac{4}{3}\pi r^3 \Delta Gv + 4\pi r^2 \gamma$$

here  $\Delta G$  is the Gibbs free energy change caused by the nucleation,  $\Delta Gv$  is the Gibbs free energy per unit volume caused by the phase transformation,  $r$  is the radius of the nuclei, and  $\gamma$  is the surface energy.

**Formula. S4** The Li<sup>+</sup> diffusion coefficient ( $D_{Li^+}$ ) can be obtained by performing GITT experiment<sup>12</sup>:

$$D_{Li^+} = \frac{4}{\pi\tau} \left( \frac{m_B V_m}{M_B S} \right)^2 \left( \frac{\Delta E_s}{\Delta E_\tau} \right)^2 \quad \left( \tau \ll \frac{L^2}{D_{Li^+}} \right)$$

here  $\tau$ ,  $\Delta E_s$  and  $\Delta E_\tau$  are relaxation time, voltage change during charge (discharge) process and relaxation process,  $m_B$ ,  $V_m$ , and  $M_B$  are the mass, molar volume, and molecular weight of the active material,  $S$  is the area of the electrode, and  $L$  is the length of Li<sup>+</sup> ion diffusion.

## Notes and reference

1. Y. Han, S. Heng, Y. Wang, Q. Qu and H. Zheng, *ACS Energy Letters*, 2020, **5**, 2421-2433.
2. Y.-G. Zou, H. Mao, X.-H. Meng, Y.-H. Du, H. Sheng, X. Yu, J.-L. Shi and Y.-G. Guo, *Angewandte Chemie International Edition*, 2021, **60**, 26535-26539.
3. L. Cheng, B. Zhang, S.-L. Su, L. Ming, Y. Zhao and X.-X. Tan, *RSC Advances*, 2021, **11**, 124-128.

4. H.-H. Ryu, S.-B. Lee and Y.-K. Sun, *Journal of Solid State Electrochemistry*, 2022, **26**, 2097–2105.
5. Y. Liu, X. Fan, B. Luo, Z. Zhao, J. Shen, Z. Liu, Z. Xiao, B. Zhang, J. Zhang, L. Ming and X. Ou, *Journal of Colloid and Interface Science*, 2021, **604**, 776-784.
6. C. Zhu, M. Cao, H. Zhang, G. Lv, J. Zhang, Y. Meng, C. Shu, W. Fan, M. Zuo, W. Xiang and X. Guo, *ACS Applied Materials & Interfaces*, 2021, **13**, 48720-48729.
7. Z. Feng, S. Zhang, R. Rajagopalan, X. Huang, Y. Ren, D. Sun, H. Wang and Y. Tang, *ACS Applied Materials & Interfaces*, 2021, **13**, 43039–43050.
8. D. H. Kim, J. H. Song, C. H. Jung, D. Eum, B. Kim, S. H. Hong and K. Kang, *Advanced Energy Materials*, 2022, **12**, 2200136.
9. Y. Bi, J. Tao, Y. Wu, L. Li, Y. Xu, E. Hu, B. Wu, J. Hu, C. Wang, J.-G. Zhang, Y. Qi and J. Xiao, *Science*, 2020, **370**, 1313-1317.
10. Y. Kim, H. Lee and S. Kang, *Journal of Materials Chemistry*, 2012, **22**, 12874–12881.
11. X. Li, L. Zhou, H. Wang, D. Meng, G. Qian, Y. Wang, Y. He, Y. Wu, Z. Hong, Z.-F. Ma and L. Li, *Journal of Materials Chemistry A*, 2021, **9**, 19675-19680.
12. C.-L. Xu, W. Xiang, Z.-G. Wu, Y.-D. Xu, Y.-C. Li, M.-Z. Chen, G. XiaoDong, G.-P. Lv, J. Zhang and B.-H. Zhong, *ACS Applied Materials & Interfaces*, 2018, **10**, 27821-27830.
